# Supplementary material
Source: ML conference proceedings conference paper supplement (https://openreview.net/forum?id=fBDS6Xr__mg)
Supplement: supplementary_material [file attachment]

## 446 A Visualization of Q-Landscape

447 Figure 5 shows the visualization of learned policies (actions given different states) and  $Q$  values in  
 448 TD3 during training in the Pendulum-v0 environment, where the state space is 3-dim and action space  
 449 is 1-dim. The red lines indicates the selected action by the current policy. The learned  $Q$  function are  
 450 always **non-convex** and **locally convex**. As a consequence, in many states the TD3 is not able to find  
 451 globally optimal solution and local gradient information may be misleading in finding actions with  
 452 the highest  $Q$  values.

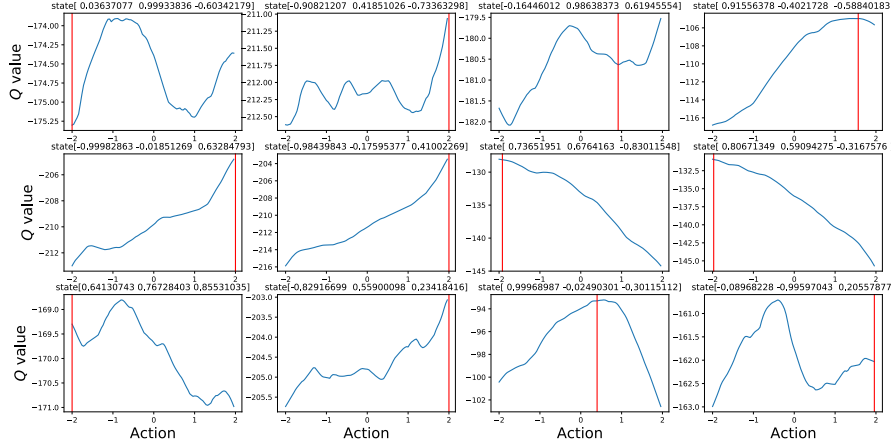

Figure 5: Landscape of learned value function of TD3 in the Pendulum-v0 environment (control task with 1-dim action space so that the state-action values can be easily visualized.)

## 453 B Missing Proofs in Section 4.2

454 **Proof of Lemma 1.** By the properties of Euclidean metric, we have the following lemma.

**Lemma 2.** Let  $\mathcal{A} \subset \mathbb{R}^d$  with Euclidean metric. Any  $a \in \mathcal{A}$ ,  $\|x\|_2 \leq k$ . Then there exists a set  $\{a_1, \dots, a_N\}$  that is a  $\frac{2k\sqrt{d}}{N^{1/d}}$ -covering of  $N$ . In other words, for all  $a \in \mathcal{A}$ ,  $\exists i \in [N]$ ,

$$\|a - a_i\|_2 \leq \frac{2k\sqrt{d}}{N^{1/d}}.$$

Define  $\mathcal{A}_i$  as the set of all the actions that is closest to  $a_i$ :

$$\mathcal{A}_i \triangleq \left\{ a \in \mathcal{A} : i = \min_{j \in [N]} \{ \arg \min \|a_j - a\|_2 \} \right\}.$$

455 Let  $P(\cdot)$  be the probability measure of uniform distribution over  $\mathcal{A}$ . We have  $P(\mathcal{A}_i) \geq 1/(2N)$ . Now  
 456 since we have  $n$  uniform samples from set  $\mathcal{A}$ . Let  $N = n/\log^2(n/\delta)$ .

457 **Lemma 3** (Coupon Collector's problem). It takes  $O(N \log^2(N/\delta))$  rounds of random sampling to  
 458 see all  $N$  distinct options with a probability at least  $1 - \delta$ .

*Proof.* Consider a general sampling problem: for any finite set  $\mathcal{N}$  with  $|\mathcal{N}| = N$ . For any  $n$ , whose sampling probability is  $p(c)$ , with a probability at least  $1 - \delta$ , it requires at most

$$\frac{\log(1/\delta)}{\log(1 + \frac{p(n)}{1-p(n)})} \text{ for } n \text{ to be sampled.}$$

Since  $\log(1+x) \geq x - \frac{1}{2}x^2$  for all  $x > 0$ , we have

$$\frac{\log(1/\delta)}{\log(1 + \frac{p(n)}{1-p(n)})} \leq \log(1/\delta) \frac{1}{\frac{p(n)}{1-p(n)} - \frac{p(n)^2}{2(1-p(n))^2}} = O(\log(1/\delta) \frac{1-p(n)}{p(n)}).$$

Searching the whole space  $\mathcal{N}$  with each new element being found with probability  $\frac{N-i}{N}$  at round  $i$ , it requires at most

$$O\left(\sum_{i=1}^N \log\left(\frac{N}{\delta}\right) \frac{N}{N-i}\right) = O(\log^2\left(\frac{N}{\delta}\right)N),$$

459 with a probability at most  $1 - \delta$ .

460 By Lemma 3 We have with a probability at least  $1 - \delta$ , there exists a sample in each  $\mathcal{A}_i$  described  
461 above. To proceed, we apply the Lipschitz of the  $Q$  function, Lemma 1 follows.

462 **Proof of Theorem 1.** Now we proceed to show Theorem 1. We denote  $\frac{2k\sqrt{d}L \log^{1/d}(n/\delta)}{n^{1/d}}$  by  $\sigma^2$ .  
463 Our global policy network gives a prediction from a linear model. Let our dataset be  $\{s_t, a_t^+\}_{t=1}^T$ .  
464 Let  $\epsilon_t = a_t^+ - a_t^*$ . Let  $\mathbf{S} = (s_1, \dots, s_T)^T$  and  $\mathbf{a}^+, \mathbf{a}^*, \boldsymbol{\epsilon}$  be the corresponding vector for  
465  $(a_t^+)_{t=1}^T, (a_t^*)_{t=1}^T, (\epsilon_t)_{t=1}^T$ . We have any  $\epsilon_i, \epsilon_j$  are independent for  $i \neq j$ . We further make an  
466 assumption that  $\mathbb{E}[\epsilon_t] = 0$ . Then we immediately have  $\mathbb{E}[\epsilon_i \epsilon_j] = 0$  as well. This assumption is just  
467 for simplifying the proof, we can show similar results without assume the unbiasedness as the bias  
468 can be bounded.

469 To proceed, let  $\theta^* = \arg \min_{\theta} \mathbb{E}_s \|s^T \theta - a^*(s)\|_2^2$ .

Since the ERM solution is simply OLS (ordinary least square). We have the estimate

$$\hat{\theta} = (\mathbf{S}^T \mathbf{S})^{-1} \mathbf{S}^T \mathbf{a}^+.$$

We have

$$\hat{\theta} - \theta^* = (\mathbf{S}^T \mathbf{S})^{-1} \mathbf{S}^T (\mathbf{a}^* - \mathbf{S} \theta^*) + (\mathbf{S}^T \mathbf{S})^{-1} \mathbf{S}^T \boldsymbol{\epsilon}.$$

Since  $\|\epsilon_t\|^2 \leq \sigma^2$ , we have  $\text{Var}(\epsilon_t) \leq \sigma^2$ . We observe that

$$\text{Var}((\mathbf{S}^T \mathbf{S})^{-1} \mathbf{S}^T \boldsymbol{\epsilon}) \leq \sigma^2 ((\mathbf{S}^T \mathbf{S})^{-1}) = \mathcal{O}(\sigma^2 p/T).$$

470 The generalization error is given by

$$\begin{aligned} & \mathbb{E}_s \|s^T \hat{\theta} - a^*(s)\|_2^2 \\ & \leq \mathbb{E}_s \|s^T \hat{\theta} - s^T \theta^*\|_2^2 + \mathbb{E}_s \|s^T \theta^* - a^*(s)\|_2^2 \\ & = \mathcal{O}\left(\frac{\sigma^2 p}{T} + \mathbb{E}_s \|s^T (\mathbf{S}^T \mathbf{S})^{-1} \mathbf{S}^T (\mathbf{a}^* - \mathbf{S} \theta^*)\|_2^2 + \mathbb{E}_s \|s^T \theta^* - a^*(s)\|_2^2\right) \\ & = \tilde{\mathcal{O}}\left(\frac{\sigma^2 p}{T} + \mathbb{E}_s \|s^T \theta^* - a^*(s)\|_2^2\right). \end{aligned}$$

## 471 C One-step Zeroth-Order Optimization with Consistent Iteration

---

### Algorithm 3 One-step Zeroth-Order Optimization with Consistent Iteration

---

**Require**

Objective function  $Q$ , domain  $\mathcal{A}$ , current point  $a_0$ , number of local samples  $n_1$ , number of global samples  $n_2$ , local scale  $\eta > 0$  and step size  $h$ , number of steps  $m$ .

**for**  $t = 1, \dots, n_2$  **do**

**Globally sampling**

Sample a point uniformly in the entire space by

$$a_{t0} \sim \mathcal{U}_{\mathcal{A}}$$

where  $\mathcal{U}_{\mathcal{A}}$  is the uniform distribution over  $\mathcal{A}$ .

**for**  $i = 1, \dots, m$  **do**

**Locally sampling**

Sample  $n_1$  points around  $a_{t,i-1}$  by

$$\tilde{a}_j = a_{t,i-1} + \mu e_j \text{ for } e_j \sim \mathcal{N}(0, I_d), j = 1, \dots, n_1,$$

where  $\mathcal{N}(0, I_d)$  is the standard normal distribution centered at 0.

**Update**

Set  $a_{t,i} = a_{t,i-1} + h(\arg \max_{a \in \{\tilde{a}_j\}} Q(a) - a_{t,i-1})$

**end for**

**end for**

**return**  $\max_{a \in \{a_{tm}\}_{t=1}^{n_2}} Q(a)$ .

---

## 472 D Implementation Details

### 473 D.1 Network Structure And Hyper-Params

474 In our experiments, we follow [8] to use a 3-layer MLP with 256 hidden units for both critic and  
 475 actor networks. We also follow [8] to use 25000 timesteps for worm-up and use a batch-size of  
 476 256 : 1 training-interaction proportion during training.

### 477 D.2 Mixture Density Networks

478 Our implementation of ZOSPI with MDN is based on neural network with multiple outputs. For  
 479 MDN with  $K$  Gaussian mixture outputs, the neural network has  $3 \times K$ -dim output. The first  $K$ -  
 480 dim units are normalized with softmax activation as the probability of selecting the Gaussians, the  
 481 following  $K$ -dim units are corresponding  $K$  mean values of the Gaussians, and the last  $K$ -dim units  
 482 are standard deviation of the  $K$  Gaussians. In our experiments, we use Diracs instead of Gaussians  
 483 for parameterization. Therefore, our networks output  $2 \times K$ -dim units for each action dimension,  
 484 where the first  $K$ -dimensions denote the probabilities and the latter  $K$ -dimensions denote the mean  
 485 values. In our experiments, we use  $K = 1$  for Hopper, HalfCheetah and Ant,  $K = 5$  for Walker2d,  
 486 and  $K = 5$  for Humanoid. ( $K = 5$  and  $K = 10$  achieve on-par performance for the Humanoid  
 487 environment, though the  $K = 10$  setting spend roughly one more time computational expense).

488 More implementation details are provided with the code in the supplementary material.

### 489 D.3 Running Time of ZOSPI

490 We conduct our experiments with 8 GTX TITAN X GPUs and 32 Intel(R) Xeon(R) E5-2640 v3 @  
 491 2.60GHz CPUs. The wall clock time of our proposed method is roughly 3-times slower than running  
 492 TD3, without application of MDNs (i.e., NoD = 1). It takes roughly 20 hours to train Hopper with  
 493 10 seeds, and takes about 120 hours to train Humanoid when NoD = 10 with 10 seeds.

## E Better Exploration with Bootstrapped Networks

Sample efficient RL requires algorithms to balance exploration and exploitation. One of the most popular way to achieve this is called optimism in face of uncertainty (OFU) [15, 44, 46], which gives an upper bound on  $Q$  estimates and applies the optimal action corresponding to the upper bound. The optimal action  $a_t$  is given by the following optimization problem:

$$\arg \max_a Q^+(s_t, a), \quad (6)$$

where  $Q^+$  is the upper confidence bound on the optimal  $Q$  function. A guaranteed exploration performance requires both a good solution for (6) and a valid upper confidence bound.

While it is trivial to solve (6) in the tabular setting, the problem can be intractable in a continuous action space. Therefore, as shown in the previous section, ZOSPI adopts a local set to approximate policy gradient descent methods in the local region and further applies a global sampling scheme to increase the potential chance of finding a better maxima.

As for the requirement of a valid upper confidence bound, we use bootstrapped  $Q$  networks to address the uncertainty of  $Q$  estimates as in [47-50, 14]. Specifically, we keep  $K$  estimates of  $Q$ , namely  $Q_1, \dots, Q_K$  with bootstrapped samples from the replay buffer. Let  $\bar{Q} = \frac{1}{K} \sum_k Q_k(s, a)$ . An upper bound  $Q^+$  is

$$Q^+(s, a) = \bar{Q} + \phi \sqrt{\frac{1}{K} \sum_k [Q_k(s, a) - \bar{Q}]^2}, \quad (7)$$

where  $\phi$  is the hyper-parameter controlling the failure rate of the upper bound. Another issue is on the update of bootstrapped  $Q$  networks. Previous methods [49] usually update each  $Q$  network with the following target  $r_t + \gamma Q_k(s_{t+1}, \pi_{\theta_t}(s_{t+1}))$ , which violates the Bellman equation as  $\pi_{\theta_t}$  is designed to be the optimal policy for  $Q^+$  rather than  $Q_k$ . Using  $\pi_{\theta_t}$  also introduces extra dependencies among the  $K$  estimates. We instead employ a global random sampling method to correct the violation as

$$r_t + \gamma \max_{i=1, \dots, n} Q_k(s_{t+1}, a_i), \quad a_1, \dots, a_n \sim \mathcal{U}_A.$$

The correction also reinforces the argument that a global random sampling method yields a good approximation to the solution of the optimization problem (6). The detailed algorithm is provided in Algorithm 4 in Appendix E.1.

### E.1 Algorithm 4: ZOSPI with Bootstrapped $Q$ networks

## F Gaussian Processes for Continuous Control

Different from previous policy gradient methods, the self-supervised learning paradigm of ZOSPI permits it to learn both its actor and critic with a regression formulation. Such a property enables the learning of actor in ZOSPI to be implemented with either parametric models like neural networks or non-parametric models like Gaussian Processes (GP). Although plenty of previous works have discussed the application of GP in RL by virtue of its natural uncertainty capture ability, most of these works are limited to model-based methods or discrete action spaces for value estimation [51-56]. On the other hand, ZOSPI formulates the policy optimization in continuous control tasks as a regression objective, therefore empowers the usage of GP policy in continuous control tasks.

As a first attempt of applying GP policies in continuous control tasks, we simply alter the actor network with a GP to interact with the environment and collect data, while the value approximator is still parameterized by a neural network. We leave the investigation of better consolidation design in future work.

## G Experiments on the Four-Solution-Maze.

The Four-Solution-Maze (FSM) environment is a diagnostic environment where four positive reward regions with a unit side length are placed in the middle points of 4 edges of a  $N \times N$  map. An agent starts from a uniformly initialized position in the map and can then move in the map by taking actions according to the location observations (current coordinates  $x$  and  $y$ ). Valid actions are limited to

---

**Algorithm 4** ZOSPI with UCB Exploration

---

**Require**

- The number of epochs  $M$ , the size of mini-batch  $N$ , momentum  $\tau > 0$  and the number of Bootstrapped  $Q$ -networks  $K$ .
- Random initialized policy network  $\pi_{\theta_1}$ , target policy network  $\pi_{\theta'_1}$ ,  $\theta'_1 \leftarrow \theta_1$ .
- $K$  random initialized  $Q$  networks, and corresponding target networks, parameterized by  $w_{k,1}, w'_{k,1}$ ,  $w'_{k,1} \leftarrow w_{k,1}$  for  $k = 1, \dots, K$ .

**for** iteration = 1, 2, ... **do****for**  $t = 1, 2, \dots, T$  **do**

# Interaction

Run policy  $\pi_{\theta'_t}$ , and collect transition tuples  $(s_t, a_t, s'_t, r_t, m_t)$ .**for** epoch  $j = 1, 2, \dots, M$  **do**Sample a mini-batch of transition tuples  $\mathcal{D}_j = \{(s, a, s', r, m)_i\}_{i=1}^N$ .# Update  $Q$ **for**  $k = 1, 2, \dots, K$  **do**Calculate the  $k$ -th target  $Q$  value  $y_{ki} = r_i + \max_l Q_{w'_{k,t}}(s'_i, a'_l)$ , where  $a'_l \sim \mathcal{U}_A$ .Update  $w_{k,t}$  with loss  $\sum_{i=1}^N m_{ik}(y_{ki} - Q_{w_{k,t}}(s_i, a_i))^2$ .**end for**# Update  $\pi$ Calculate the predicted action  $a_0 = \pi_{\theta'_t}(s_i)$ Sample actions  $a_l \sim \mathcal{U}_A$ Select  $a^+ \in \{a_l\} \cup \{a_0\}$  as the action with maximal  $Q^+(s_t, a)$  defined in (7).

Update policy network with Eq.(2).

**end for** $\theta'_{t+1} \leftarrow \tau \theta_t + (1 - \tau) \theta'_t$ . $w'_{k,t+1} \leftarrow \tau w_{k,t} + (1 - \tau) w'_{k,t}$ . $w_{k,t+1} \leftarrow w_{k,t}; \theta_{t+1} \leftarrow \theta_t$ .**end for****end for**

---

531  $[-1, 1]$  for both  $x$  and  $y$  axes. Each game consists of  $2N$  timesteps for the agent to navigate in the  
532 map and collect rewards. In each timestep, the agent will receive a +10 reward if it is inside one of  
533 the 4 reward regions or a tiny penalty otherwise. For simplicity, there are no obstacles in the map,  
534 the optimal policy thus will find the nearest reward region, directly move towards it, and stay in the  
535 region till the end. Figure 6(a) visualizes the environment and the ground-truth optimal solution.

536 Although the environment is simple, we found it extremely challenging due to existence of multiple  
537 sub-optimal policies that only find some but not all four reward regions. We do not conduct grid  
538 search on hyper-parameters of the algorithms compared in our experiments but set them to default  
539 setting across all experiments. Though elaborated hyper-parameter tuning may benefit for certain  
540 environment.

541 On this environment we compare ZOSPI to on-policy and off-policy SOTA policy gradient methods  
542 in terms of the learning curves, each of which is averaged by 5 runs. The results are presented in  
543 Figure 6(b). And learned policies from different methods are visualized in Figure 6(c), 6(i). For each  
544 method we plot the predicted behaviors of its learned policy at grid points using arrows (although  
545 the environment is continuous in the state space), and show the corresponding value function of its  
546 learned policy with a colored map. All policies and value functions are learned with 0.3M interactions  
547 except for SAC whose figures are learned with 1.2M interactions as it can find 3 out of 4 target  
548 regions when more interactions are provided.

549 We use 4 bootstrapped  $Q$  networks for the upper bound estimation in consideration of both better  
550 value estimation and computational cost for ZOSPI with UCB. And in ZOSPI with GP, a GP model is  
551 used to replace the actor network in data-collection, *i.e.*, exploration. The sample efficiency of ZOSPI  
552 is much higher than that of other methods. Noticeably ZOSPI with UCB exploration is the only  
553 method that can find the optimal solution, *i.e.*, a policy directs to the nearest region with a positive  
554 reward. All other methods get trapped in sub-optimal solutions by moving to only part of reward  
555 regions they find instead of moving toward the nearest one.

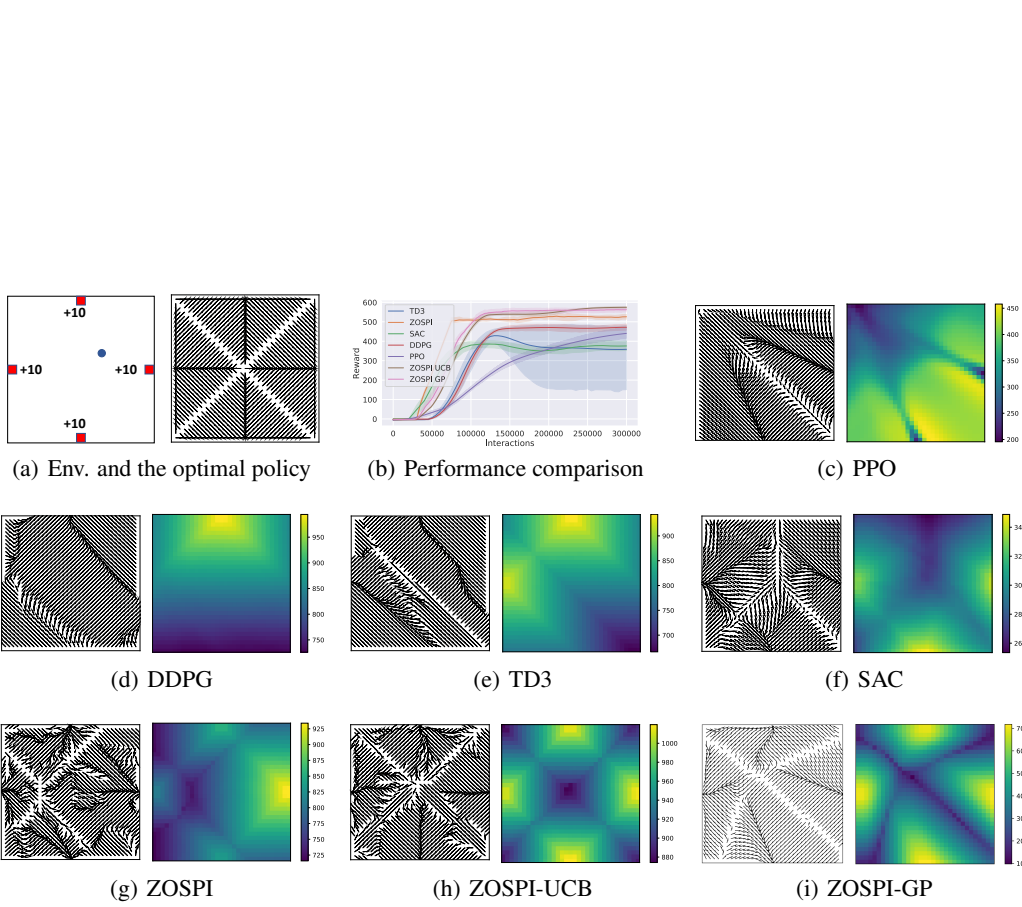

Figure 6: Visualization of learned policies on the FSM environment. (a) the FSM environment and its optimal solution, where the policy should find the nearest reward region and move toward it; (b) learning curves of different approaches; (c)-(i) visualize the learned policies and corresponding value functions. We run multiple repeat experiments and show the most representative and well-performing learned value function and policy of each method.
